# Supplementary material for: Safety, Immunogenicity, and Efficacy of the NVX-CoV2373 COVID-19 Vaccine in Adolescents
Source: PubMed Central journal article supplement (PMC10536880; doi:10.1001/jamanetworkopen.2023.9135), 2023-04-03
Supplement: NIHMS1927823-supplement-Supplement_4_Data_Sharing_Statement.pdf [file NIHMS1927823-supplement-Supplement_4_Data_Sharing_Statement.pdf]

## Data Sharing Statement

Áñez. Safety, Immunogenicity, and Efficacy of the NVX-CoV2373 COVID-19 Vaccine in Adolescents. *JAMA Netw Open*. Published April 26, 2023.  
doi:10.1001/jamanetworkopen.2023.9135

### Data

**Data available:** No
